# Supplementary material
Source: publisher figshare collection journal article supplement (https://acs.figshare.com/ndownloader/files/3741403)
Supplement: Supplementary file 1 [file 3741403]

## ***Supporting Information***

### **Specific enrichment of peptides with N-terminal serine/threonine by a solid-phase capture-release approach for efficient proteomics analysis**

**Yating Yao<sup>a,b</sup>, Junfeng Huang<sup>a,b</sup>, Kai Cheng<sup>a,b</sup>, Yanbo Pan<sup>a,b</sup>, Hongqiang Qin<sup>a</sup>,  
Mingliang Ye<sup>a,\*</sup>, Hanfa Zou<sup>a,\*</sup>**

<sup>a</sup> Key Laboratory of Separation Science for Analytical Chemistry, Dalian Institute of Chemical Physics, Chinese Academy of Sciences (CAS), Dalian, 116023, China  
E-mail: mingliang@dicp.ac.cn, hanfazou@dicp.ac.cn; Fax: +86-411-84379620; Tel: +86-411-84379620, +86-411-84379610

<sup>b</sup> University of Chinese Academy of Sciences, Beijing 100049, China

## SUMMARY

This supporting information file includes additional results and information as described in the text of the main article. Including:

## Supplementary figures

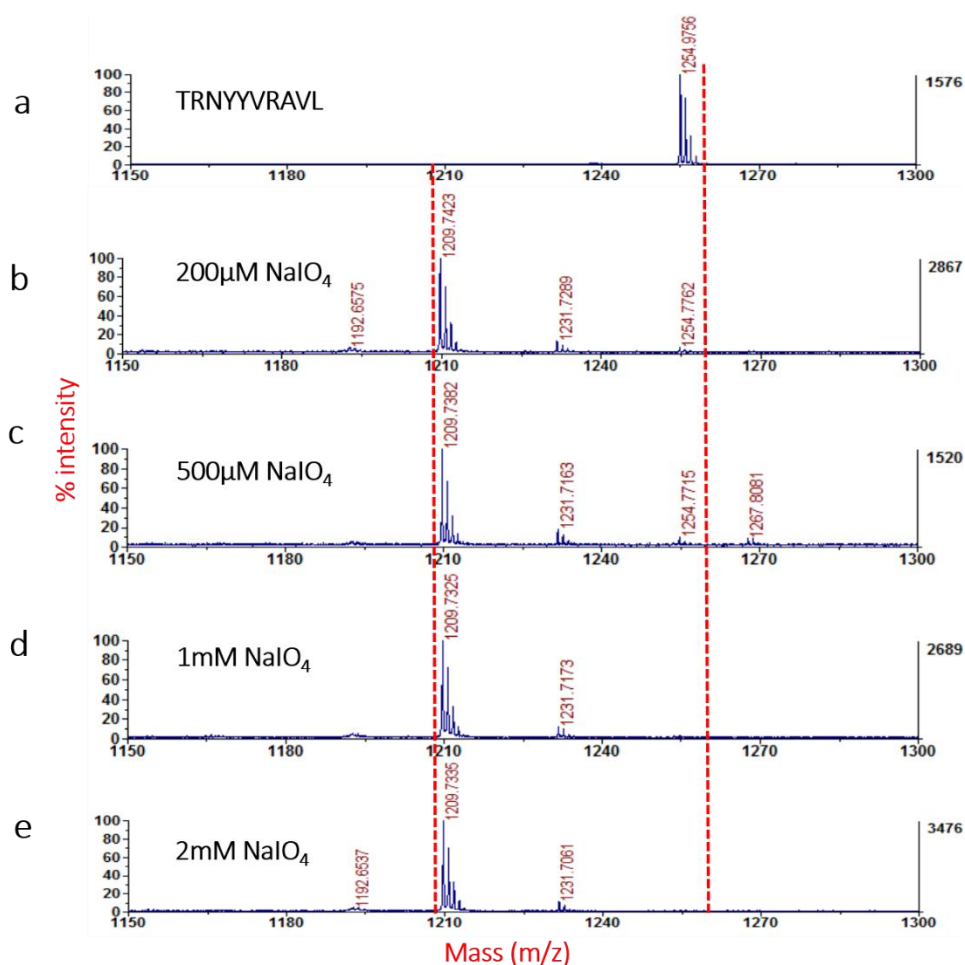

**Figure S1. Optimization of sodium periodate concentration for the oxidation of N-terminal threonine.** MALDI mass spectra of the standard peptide TRNYYVRAVL containing N-terminal threonine: (a) native peptide and (b-e) peptide oxidized at 200  $\mu\text{M}$  NaIO<sub>4</sub>, 500  $\mu\text{M}$  NaIO<sub>4</sub>, 1 mM NaIO<sub>4</sub> and 2 mM NaIO<sub>4</sub>, respectively.

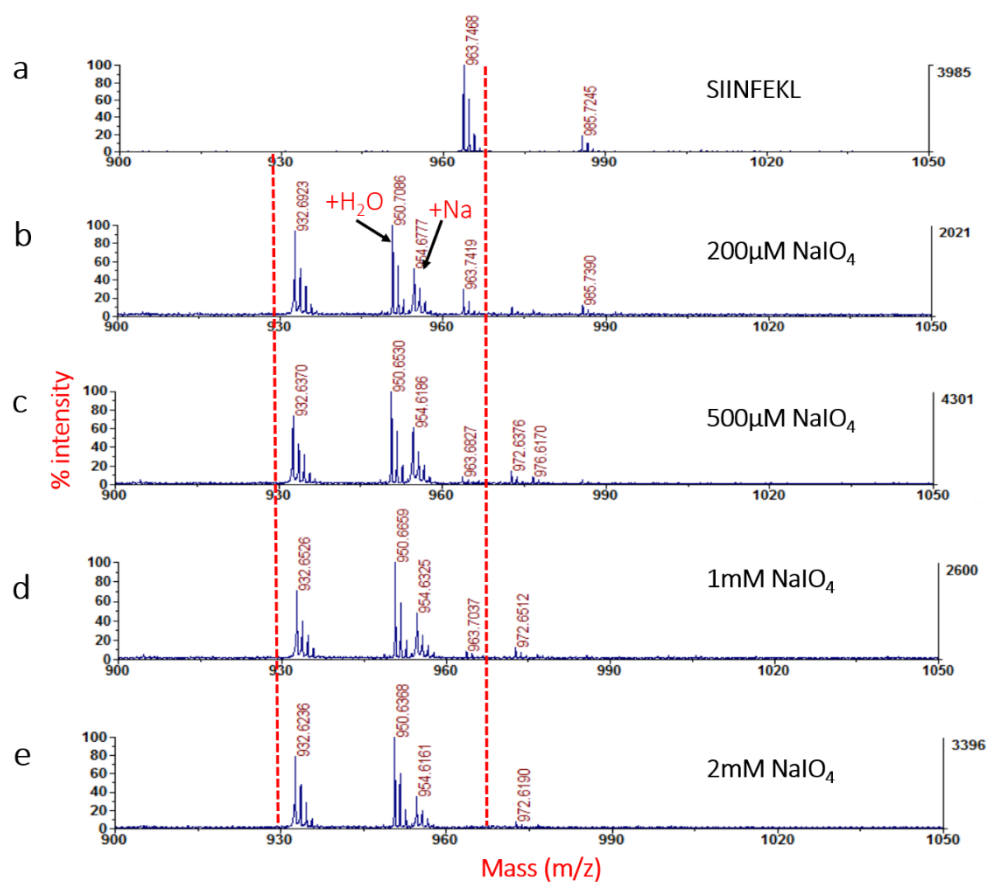

**Figure S2. Optimization of sodium periodate concentration for the oxidation of N-terminal serine.** MALDI mass spectra of the standard peptide SIINFEKL containing N-terminal serine: (a) native peptide and (b-e) peptide oxidized at 200  $\mu\text{M}$   $\text{NaIO}_4$ , 500  $\mu\text{M}$   $\text{NaIO}_4$ , 1 mM  $\text{NaIO}_4$  and 2 mM  $\text{NaIO}_4$ , respectively.

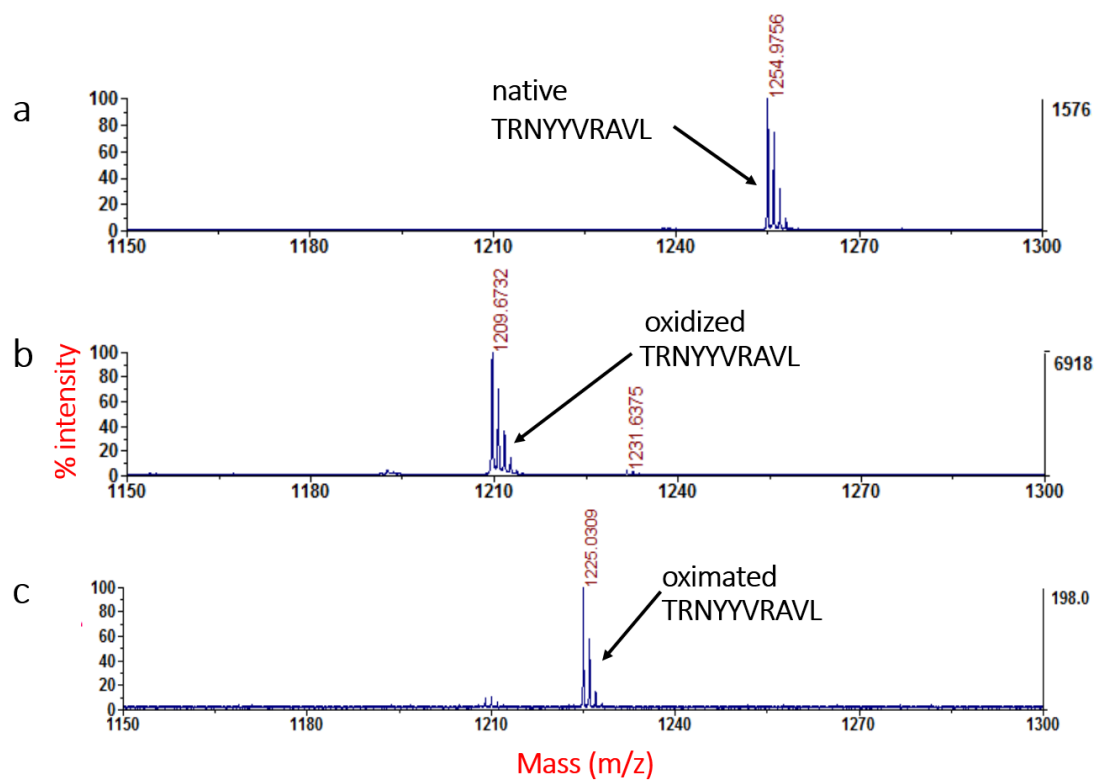

**Figure S3. Enrichment of the standard peptide TRNYYVRAVL with N-terminal threonine:** (a) original peptide, (b) peptide oxidized at 2 mM NaIO<sub>4</sub>, and (c) peptide released from hydrazide beads with hydroxylamine chloride.

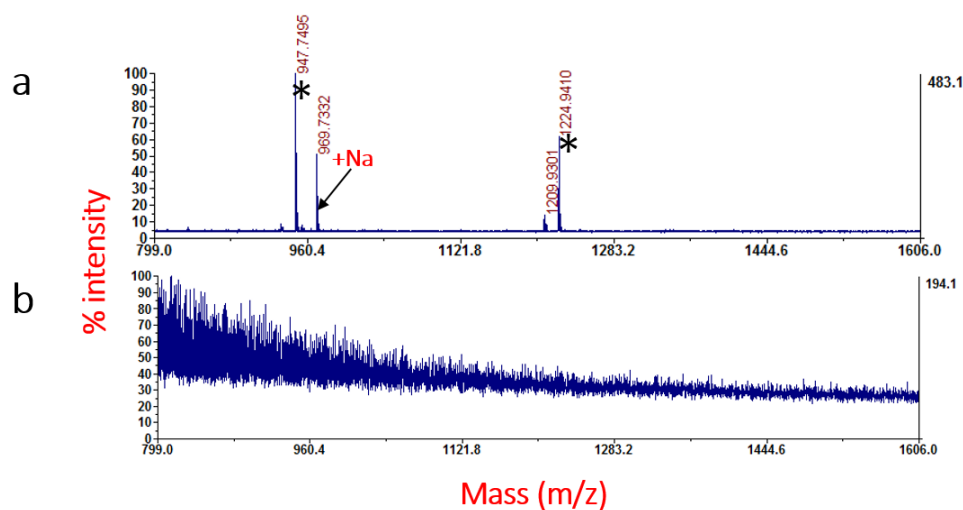

**Figure S4. Investigating the efficiency of the release step with standard peptide mixture.** The peptide mixture containing two standard peptides, SIINFEKL with N-terminal serine, TRNYVVRAVL with N-terminal threonine were coupled onto the hydrazide beads and released with two successive elutions with hydroxylamine chloride. MALDI mass spectra of: (a) the first elute, and (b) the second elute (peaks with N-terminal serine/threonine peptides are marked with asterisks).

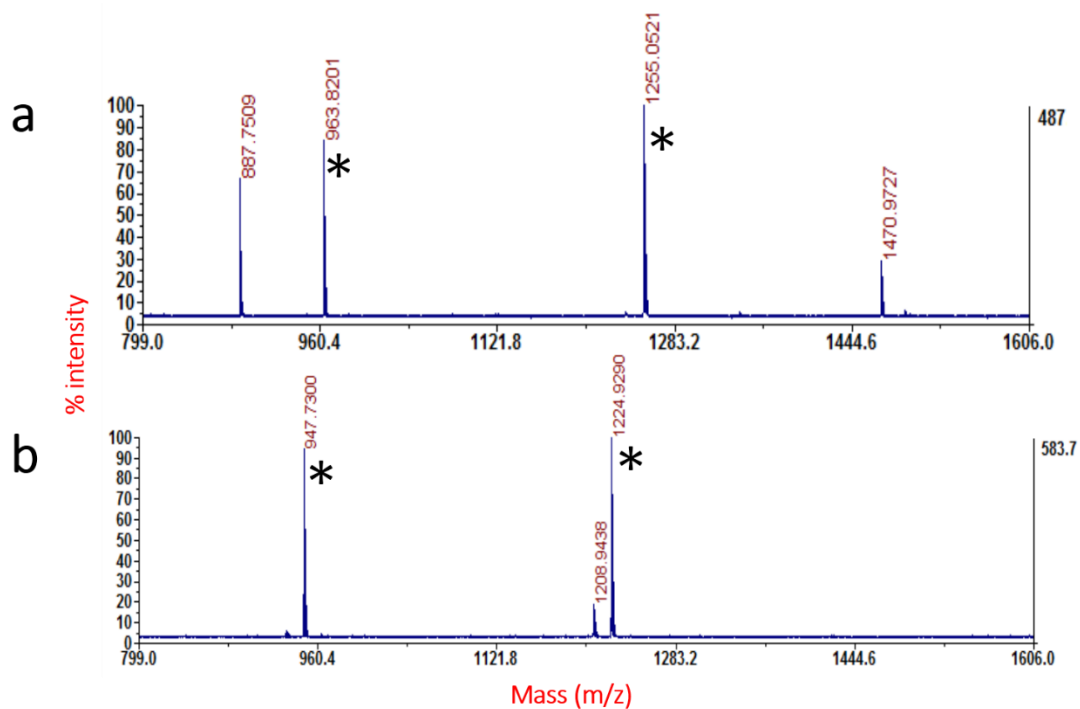

**Figure S5. Specificity investigation of the enrichment strategy with standard peptide mixture.** MALDI mass spectra of the peptide mixture containing four standard peptides, SIINFEKL with N-terminal serine, TRNYVRAVL with N-terminal threonine, GRRNSIGK and EESLESDVDADF with neither N-terminal serine nor N-terminal threonine: (a) peptide mixture before enrichment and (b) peptide mixture after enrichment (peaks with N-terminal serine/threonine peptides are marked with asterisks).

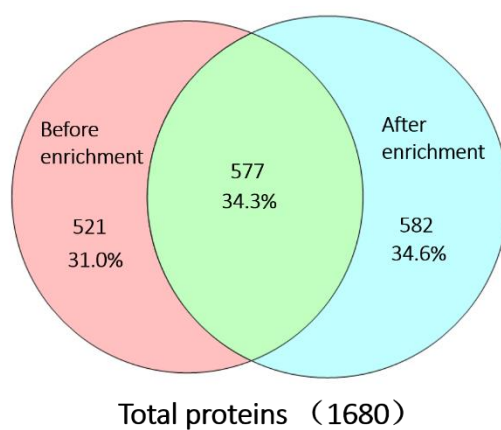

**Figure S6. Complementary protein identifications by selective enrichment of N-terminal serine/threonine peptides from mouse liver samples digested by Lys-C.**

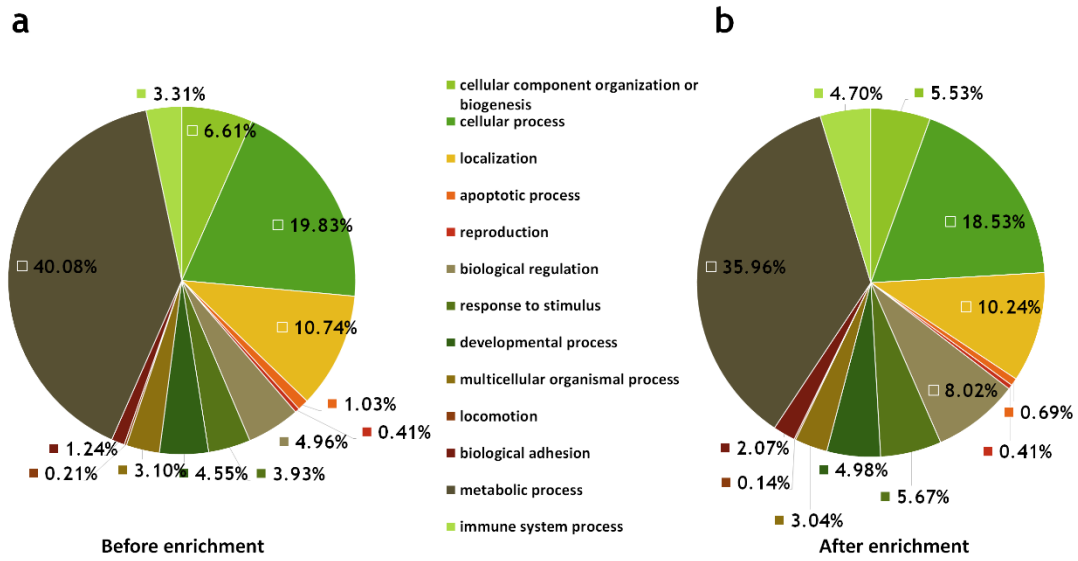

**Figure S7. Pie chart representations of the distribution of uniquely identified proteins from the trypsin digested mouse liver sample with and without enrichment according to their biological processes.**



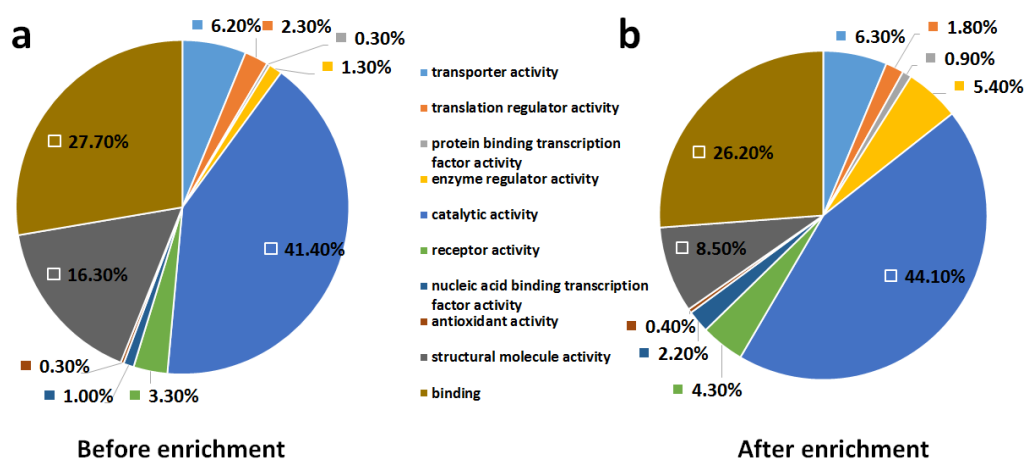

**Figure S8. Pie chart representations of the distribution of uniquely identified proteins from the trypsin digested mouse liver sample with and without enrichment according to their molecular functions.**

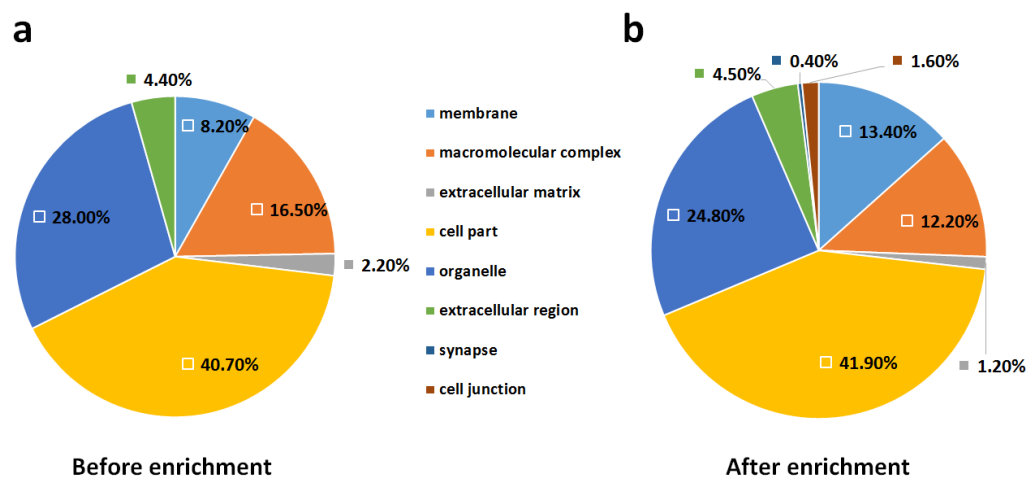

**Figure S9. Pie chart representations of the distribution of uniquely identified proteins from the trypsin digested mouse liver sample with and without enrichment according to their cellular components.**

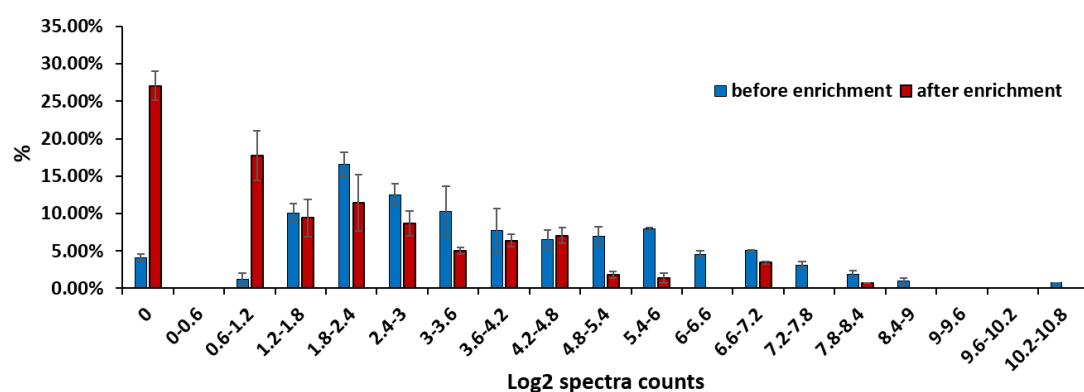

**Figure S10. The distribution of the identified serum proteins from tryptic digests before and after enrichment across the spectra counts.** The above data were averaged from 3 replicates (error bars represent the standard deviation).

## Supplementary table

**Table S1.** The number of peptides containing the target sequences and their representative coverage of the mouse proteome based on in silico digestion.

|                   | Total peptide number | #S/T containing peptide number | % of peptide | % of coverage |
|-------------------|----------------------|--------------------------------|--------------|---------------|
| Trypsin digestion | 3107991              | 440429                         | 14.17%       | 88.17%        |
| Lys-C digestion   | 1452193              | 187402                         | 12.90%       | 72.75%        |
| Arg-C digestion   | 1506814              | 184495                         | 12.24%       | 70.69%        |
| Glu-C digestion   | 1957465              | 225212                         | 11.50%       | 73.14%        |

Numbers were obtained through in silico digestion of the protein sequences in the mouse proteome from the UniProtKB/Swiss-Prot database with 51221 total protein entries. Peptides with 6-30 residues and with 0-1 missed cleavage site were considered.
